# Supplementary material for: Photoluminescent chain-of-dimer anion in a novel hybrid halometallate (C5H14N2)3{Sb2Br9}2: atypical behavior in one-dimensional anionic systems
Source: Royal Society of Chemistry journal article supplement (doi:10.1039/d4dt02751e), 2024-11-27
Supplement: d4dt02751e1.pdf [file d4dt02751e1.pdf]

## SUPPLEMENTARY INFORMATION

### A Chain-of-Dimers Anion in a Novel Hybrid Halometallate (C<sub>5</sub>H<sub>14</sub>N<sub>2</sub>)<sub>3</sub>{Sb<sub>2</sub>Br<sub>9</sub>}<sub>2</sub> Exhibiting Photoluminescence Atypical for One- Dimensional Anions

**Andrei V. Bykov,<sup>a</sup> Tatiana A. Shestimerova,<sup>a</sup> Mikhail A. Bykov,<sup>a</sup> Victoria E. Gontcharenko,<sup>b,c</sup>  
Konstantin A. Lyssenko,<sup>a</sup> Mikhail T. Metlin,<sup>b</sup> Ilya V. Taydakov,<sup>b,d</sup> Anastasia V. Grigorieva<sup>a,e</sup>  
and Andrei V. Shevelkov<sup>\*a</sup>**

<sup>a</sup> Department of Chemistry, Lomonosov Moscow State University, 119991 Moscow, Russia

<sup>b</sup> P.N. Lebedev Physical Institute of the Russian Academy of Sciences, 119991 Moscow, Russia

<sup>c</sup> Faculty of Chemistry, National Research University Higher School of Economics, 101000 Moscow, Russia

<sup>d</sup> N.D. Zelinsky Institute of Organic Chemistry Russian Academy of Sciences, 119991 Moscow, Russia

<sup>e</sup> Faculty of Materials Science, Lomonosov Moscow State University, 119991 Moscow, Russia

## Table of Contents

|                                                                                                                                                                 |          |
|-----------------------------------------------------------------------------------------------------------------------------------------------------------------|----------|
| <i>Figure S1. Results of the Rietveld profile analysis.....</i>                                                                                                 | <i>3</i> |
| <i>Figure S2. XRF spectrum of <math>(C_5H_{14}N_2)_3\{Sb_2Br_9\}_2</math>.....</i>                                                                              | <i>3</i> |
| <i>Figure S3. Temperature-dependent PL spectra with normalized intensity for the red band .....</i>                                                             | <i>4</i> |
| <i>Figure S4. Temperature-depending PL spectra fitting .....</i>                                                                                                | <i>5</i> |
| <i>Figure S5. PL lifetime for broad red emission near 625 nm .....</i>                                                                                          | <i>6</i> |
| <i>Figure S6. FWHM vs. temperature plot for the IR band near 880 nm .....</i>                                                                                   | <i>6</i> |
| <i>Equation S1. The average lifetime for the double exponential curve .....</i>                                                                                 | <i>6</i> |
| <i>Table S1. Selected bond angles for the <math>\{Sb_2Br_9\}^{3-}</math> anion in the crystal structure of <math>(C_5H_{14}N_2)_3\{Sb_2Br_9\}_2</math>.....</i> | <i>7</i> |
| <i>Table S2. Length of Br...Br contacts and shortest Sb...Sb distances .....</i>                                                                                | <i>8</i> |
| <i>Table S3. Results of temperature-dependent PL spectra fitting .....</i>                                                                                      | <i>8</i> |

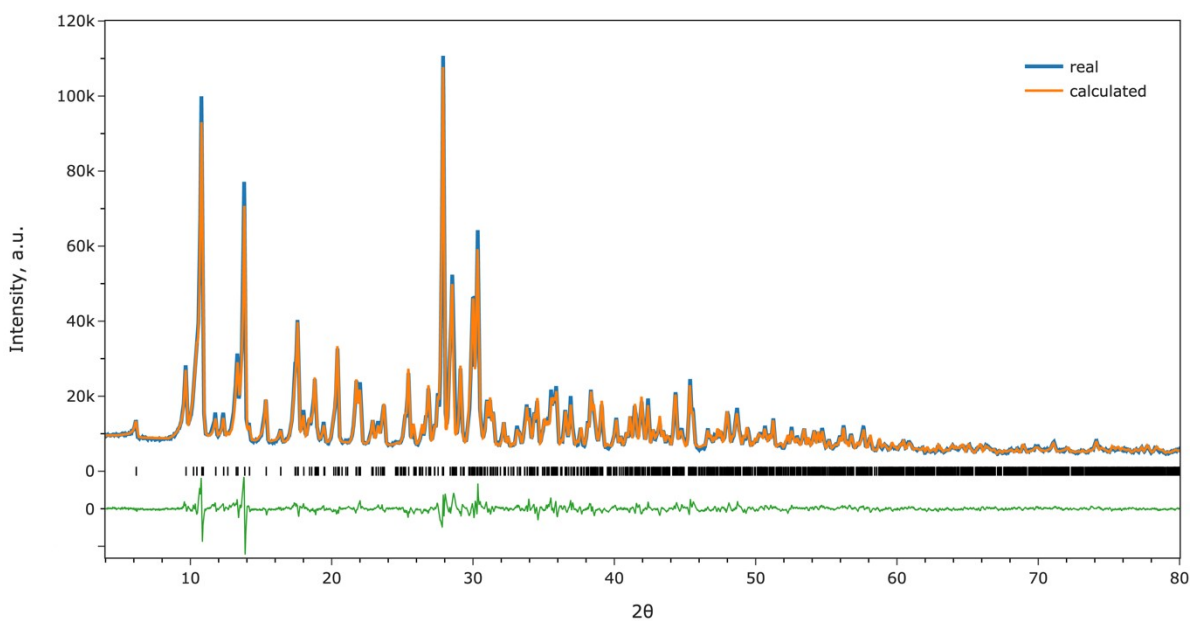

**Figure S1.** Results of the Rietveld profile analysis: triclinic,  $a = 9.46110(10)$  Å,  $b = 10.18888(12)$  Å,  $c = 5.29902(17)$  Å,  $\alpha = 95.4714(8)^\circ$ ,  $\beta = 105.9850(10)^\circ$ ,  $\gamma = 113.1576(9)^\circ$ ,  $V = 1268.46(3)$  Å<sup>3</sup>,  $R_p = 0.0482$ ,  $wR_p = 0.0665$ .

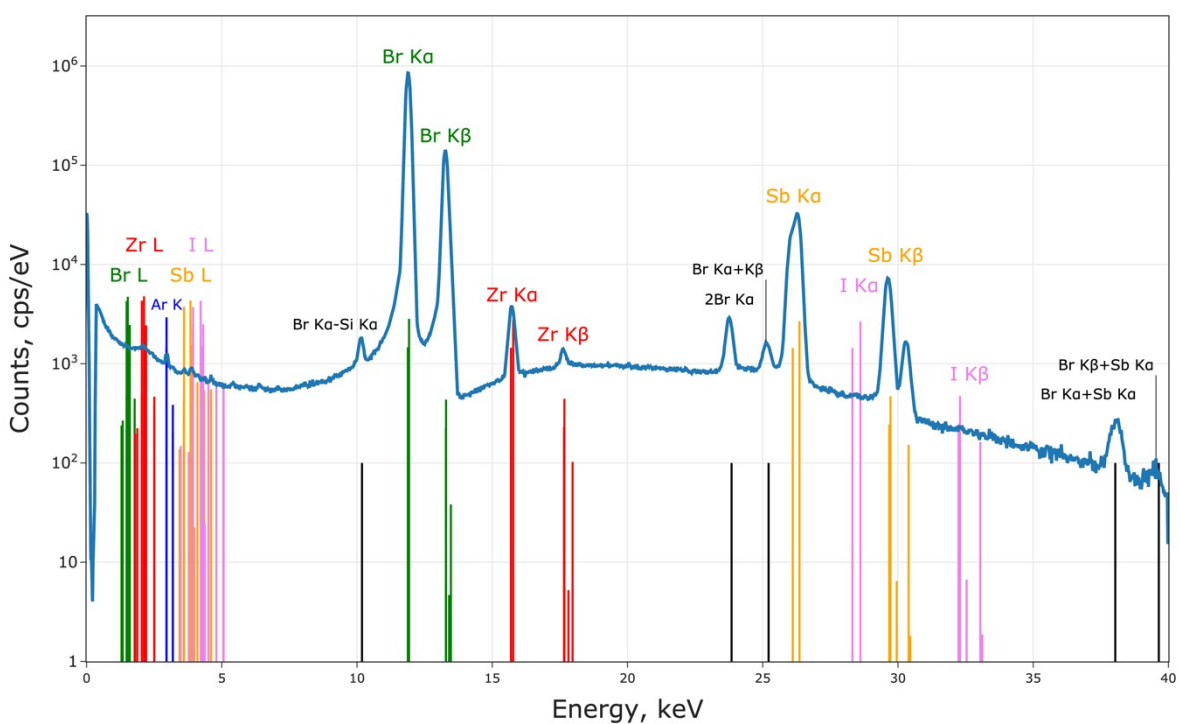

**Figure S2.** X-ray fluorescence (XRF) spectrum of  $(C_5H_{14}N_2)_3\{Sb_2Br_9\}_2$  and theoretical X-ray fluorescence lines of elements: orange – Sb, green – Br, violet – I, red – Zr, blue – Ar, black – escape and sum peaks. Element analysis demonstrates the presence of Br and Sb and the absence of I in

the sample. There are Zr lines and Ar lines at the spectra, because zirconium is a casing material of X-ray tube and argon is a part of air, respectively. Also, there are sum peaks at the spectrum: sum of two Br K $\alpha$  lines, Br K $\alpha$  + Br K $\beta$ , Br K $\alpha$  + Sb K $\alpha$ , and Br K $\beta$  + Sb K $\alpha$  lines. In addition, the escape peak Br K $\alpha$  - Si K $\alpha$  is observed (Si is a detector material).

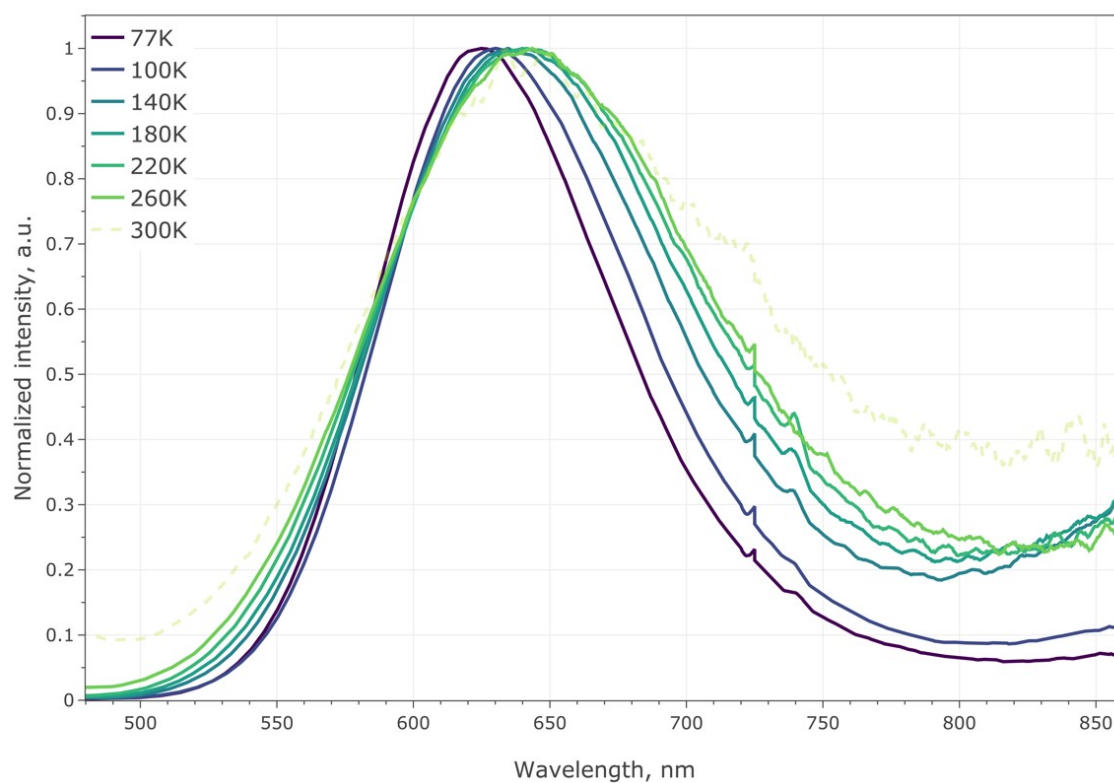

**Figure S3.** Temperature-dependent PL spectra with normalized intensity for the red emission band.

### Bands fitting

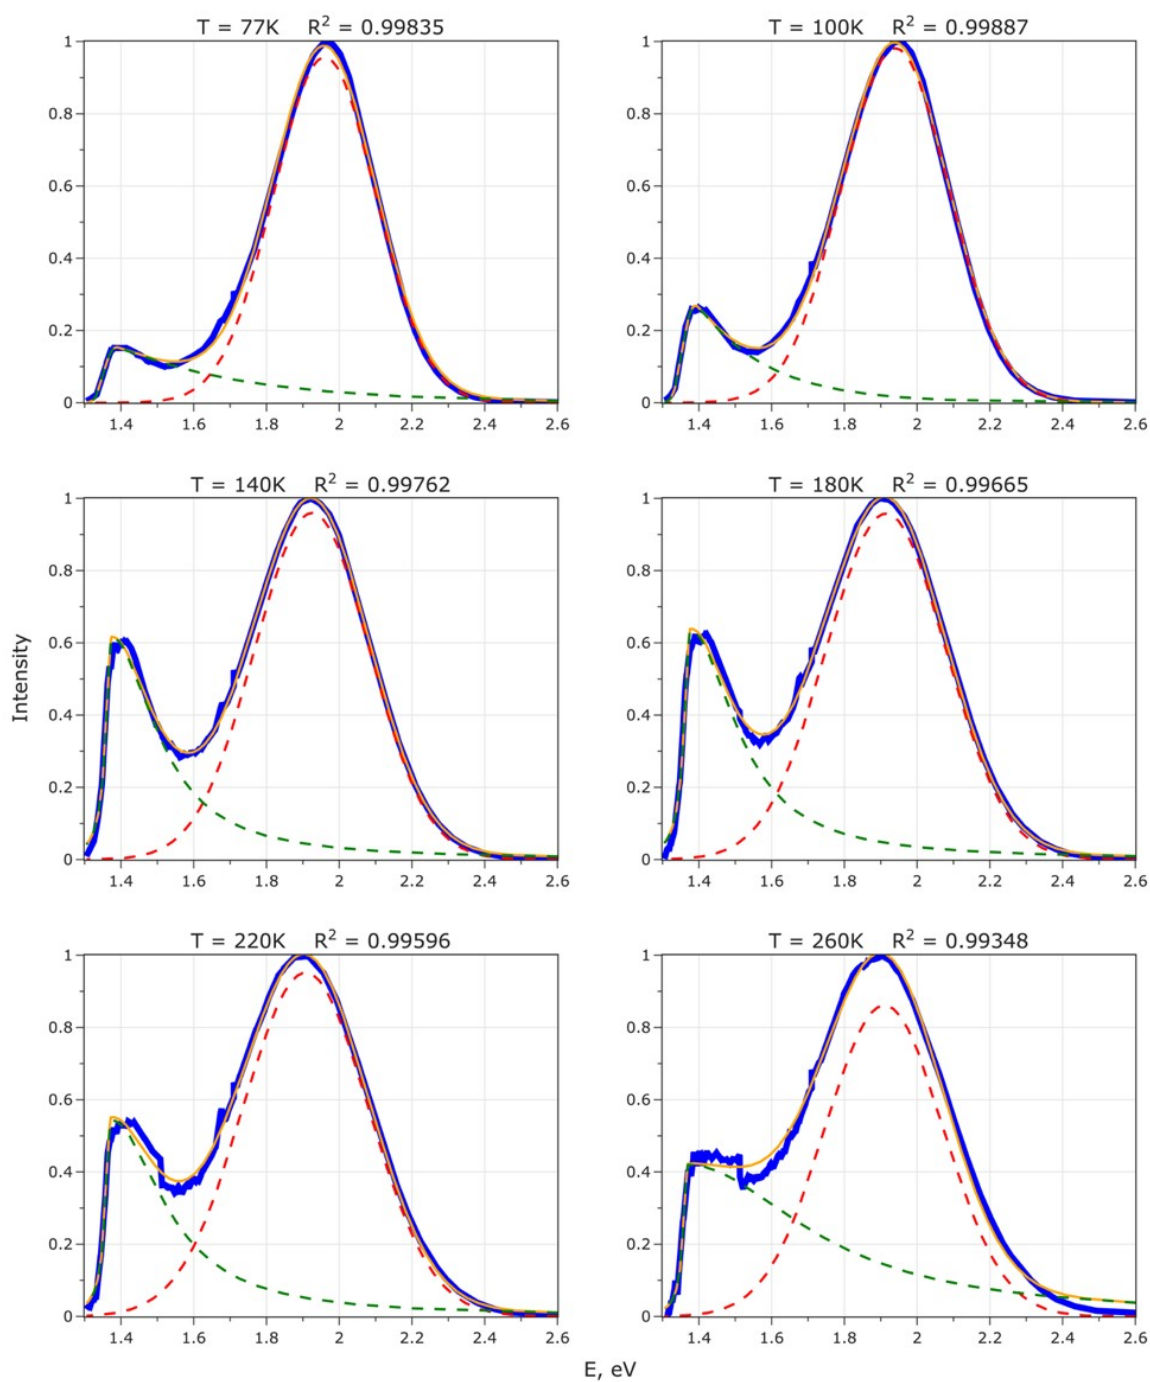

**Figure S4.** Temperature-depending PL spectra fitting.

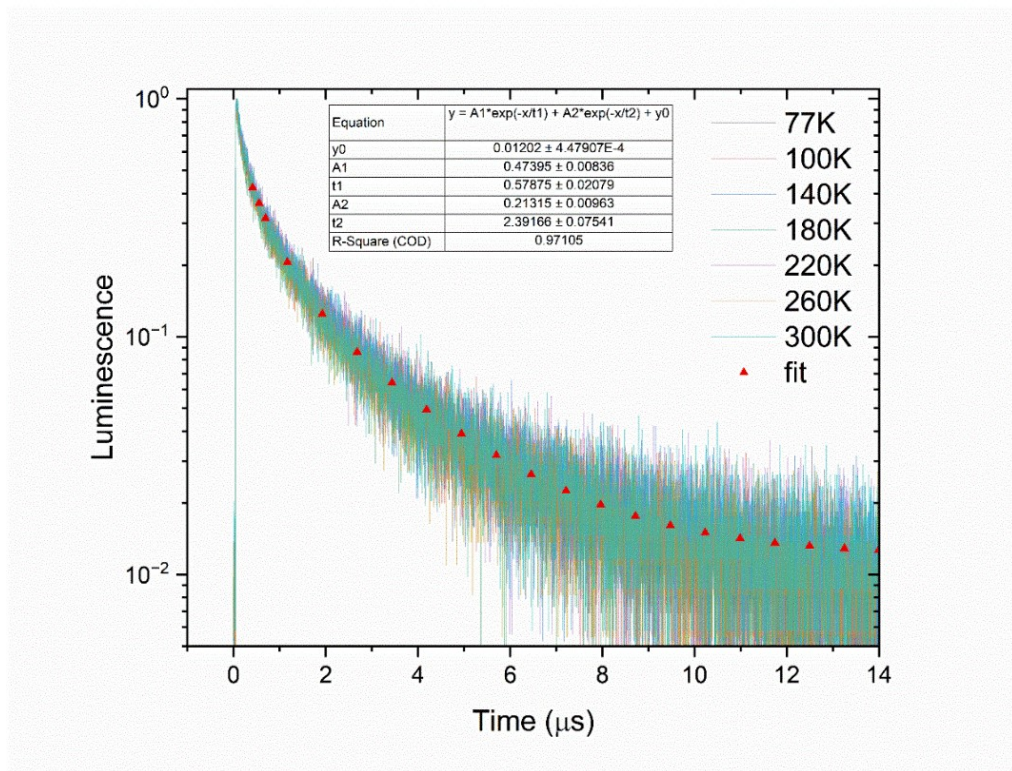

**Figure S5.** PL lifetime for broad red emission near 625 nm.

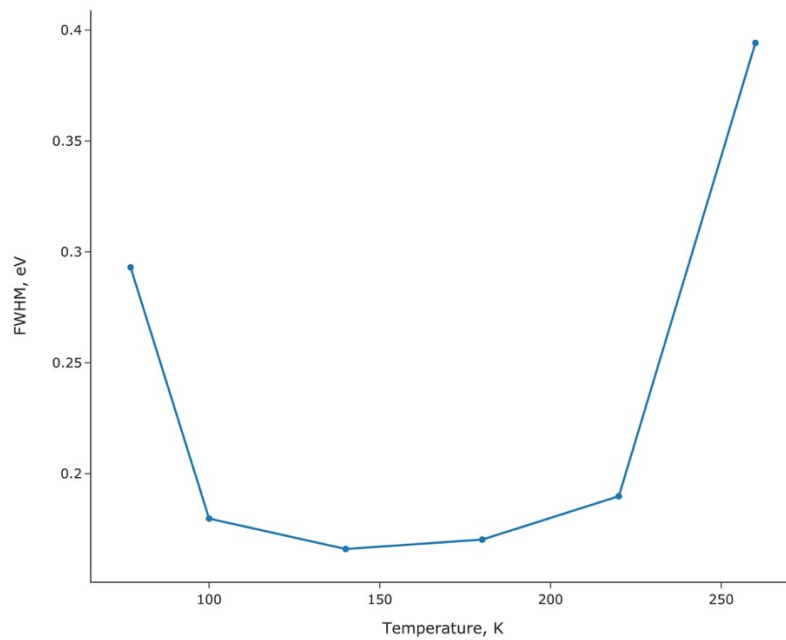

**Figure S6.** Full width at half maximum (*FWHM*) vs. temperature plot for the IR band near 880 nm.

**Equation S1.** The average lifetime for the double exponential curve:

$$\tau_{av} = \frac{A_1 \tau_1^2 + A_2 \tau_2^2}{A_1 \tau_1 + A_2 \tau_2}$$

**Table S1.** Selected bond angles for the  $\{\text{Sb}_2\text{Br}_9\}^{3-}$  anion in the crystal structure of  $(\text{C}_5\text{H}_{14}\text{N}_2)_3\{\text{Sb}_2\text{Br}_9\}_2$ .

| Atoms                      | Angle, °   |
|----------------------------|------------|
| Br1—Sb1—Br6                | 90.23(9)   |
| Br1—Sb1—Br4                | 176.62(12) |
| Br4—Sb1—Br5                | 89.65(11)  |
| Br4—Sb1—Br6                | 90.61(11)  |
| Br4—Sb1—Br2                | 94.31(15)  |
| Br4—Sb1—Br3                | 93.15(13)  |
| Br5—Sb1—Br1                | 87.00(10)  |
| Br5—Sb1—Br6                | 95.65(11)  |
| Br2—Sb1—Br1                | 84.99(12)  |
| Br2—Sb1—Br5                | 86.65(13)  |
| Br2—Sb1—Br6                | 174.59(15) |
| Br2—Sb1—Br3                | 92.20(15)  |
| Br3—Sb1—Br1                | 90.19(13)  |
| Br3—Sb1—Br5                | 177.05(14) |
| Br3—Sb1—Br6                | 85.27(12)  |
| Br6—Sb2—Br5                | 95.72(11)  |
| Br6—Sb2—Br10               | 86.63(10)  |
| Br7—Sb2—Br5                | 90.63(11)  |
| Br7—Sb2—Br6                | 90.02(11)  |
| Br7—Sb2—Br9                | 94.43(13)  |
| Br7—Sb2—Br10               | 176.65(12) |
| Br9—Sb2—Br5                | 86.04(12)  |
| Br9—Sb2—Br6                | 175.20(13) |
| Br9—Sb2—Br10               | 88.91(12)  |
| Br8—Sb2—Br5                | 174.64(15) |
| Br8—Sb2—Br6                | 86.00(13)  |
| Br8—Sb2—Br7                | 94.45(14)  |
| Br8—Sb2—Br9                | 91.85(14)  |
| Br8—Sb2—Br10               | 85.17(12)  |
| Br10—Sb2—Br5               | 89.85(10)  |
| Br14—Sb3—Br15              | 93.08(10)  |
| Br14—Sb3—Br10              | 97.13(10)  |
| Br13—Sb3—Br14              | 88.72(11)  |
| Br13—Sb3—Br15              | 83.36(11)  |
| Br13—Sb3—Br10              | 170.52(12) |
| Br12—Sb3—Br14              | 177.42(14) |
| Br12—Sb3—Br15              | 89.46(11)  |
| Br12—Sb3—Br13              | 91.98(13)  |
| Br12—Sb3—Br10              | 82.50(11)  |
| Br11—Sb3—Br14              | 85.22(11)  |
| Br11—Sb3—Br15              | 177.17(12) |
| Br11—Sb3—Br13              | 94.32(13)  |
| Br11—Sb3—Br12              | 92.25(14)  |
| Br11—Sb3—Br10              | 93.60(12)  |
| Br10—Sb3—Br15              | 88.86(10)  |
| Br1 <sup>i</sup> —Sb4—Br14 | 88.43(9)   |

|                           |            |
|---------------------------|------------|
| Br16—Sb4—Br14             | 82.97(11)  |
| Br16—Sb4—Br1 <sup>i</sup> | 169.88(12) |
| Br16—Sb4—Br15             | 88.65(11)  |
| Br15—Sb4—Br14             | 92.91(10)  |
| Br15—Sb4—Br1 <sup>i</sup> | 97.14(10)  |
| Br17—Sb4—Br14             | 88.82(11)  |
| Br17—Sb4—Br1 <sup>i</sup> | 82.24(11)  |
| Br17—Sb4—Br16             | 92.21(12)  |
| Br17—Sb4—Br15             | 178.15(14) |
| Br18—Sb4—Br14             | 177.07(12) |
| Br18—Sb4—Br1 <sup>i</sup> | 94.16(12)  |
| Br18—Sb4—Br16             | 94.58(13)  |
| Br18—Sb4—Br15             | 85.41(12)  |
| Br18—Sb4—Br17             | 92.88(14)  |
| Sb3—Br14—Sb4              | 86.99(9)   |
| Sb1—Br1—Sb4 <sup>ii</sup> | 174.84(13) |
| Sb1—Br5—Sb2               | 84.29(10)  |
| Sb4—Br15—Sb3              | 87.02(9)   |
| Sb2—Br6—Sb1               | 84.34(10)  |
| Sb3—Br10—Sb2              | 174.91(12) |

Symmetry code: (i)  $x, y, 1 + z$ ; (ii)  $x, y, -1 + z$ .

**Table S2.** Length of Br...Br contacts and shortest Sb...Sb distances.

| Atoms                     | Distance, Å |
|---------------------------|-------------|
| Br8...Br11 <sup>i</sup>   | 3.5875(7)   |
| Br2...Br18 <sup>ii</sup>  | 3.5922(7)   |
| Br9...Br11 <sup>iii</sup> | 3.6811(4)   |
| Br3...Br18 <sup>iv</sup>  | 3.6835(4)   |
| Sb1...Sb2                 | 4.2148(2)   |
| Sb3...Sb4                 | 4.3968(3)   |

Symmetry code: (i)  $x, 1 + y, z$ ; (ii)  $x, -1 + y, -1 + z$ ; (iii)  $1 + x, 1 + y, z$ ; (iv)  $-1 + x, -1 + y, -1 + z$ .

**Table S3.** Results of temperature-dependent PL spectra fitting.

| $T, K$ | $E_{max}, eV$ | $FWHM, eV$ |
|--------|---------------|------------|
| 77     | 1.960         | 0.3309     |
| 100    | 1.940         | 0.3454     |
| 140    | 1.925         | 0.3712     |
| 180    | 1.915         | 0.3883     |
| 220    | 1.908         | 0.4064     |
| 260    | 1.910         | 0.4230     |
